# Supplementary material
Source: publisher figshare collection journal article supplement (https://acs.figshare.com/ndownloader/files/10710916)
Supplement: Supplementary file 1 [file 10710916]

# **Core-Shell $\text{Fe}_{1-x}\text{S}@\text{Na}_{2.9}\text{PS}_{3.95}\text{Se}_{0.05}$ Nanorods for Room Temperature All-Solid-State Sodium Batteries with High Energy Density**

*Hongli Wan<sup>†,§</sup>, Jean Pierre Mwizerwa<sup>†,§</sup>, Xingguo Qi<sup>‡,§</sup>, Xin Liu<sup>†</sup>, Xiaoxiong Xu<sup>†</sup>, Hong Li<sup>‡</sup>, Yong-Sheng Hu<sup>\*,‡,§</sup>, Xiayin Yao<sup>\*,†</sup>*

<sup>†</sup>Ningbo Institute of Materials Technology and Engineering, Chinese Academy of Sciences, 315201, Ningbo, P. R. China

<sup>‡</sup>Key Laboratory for Renewable Energy, Beijing Key Laboratory for New Energy Materials and Devices, Beijing National Laboratory for Condensed Matter Physics, Institute of Physics, Chinese Academy of Sciences, 100190, Beijing, P.R. China

<sup>§</sup>University of Chinese Academy of Sciences, 100049, Beijing, P. R.China

\* Corresponding authors: yaoxy@nimte.ac.cn (X.Y. Yao) and yshu@iphy.ac.cn (Y.-S. Hu)

## Supporting Figures

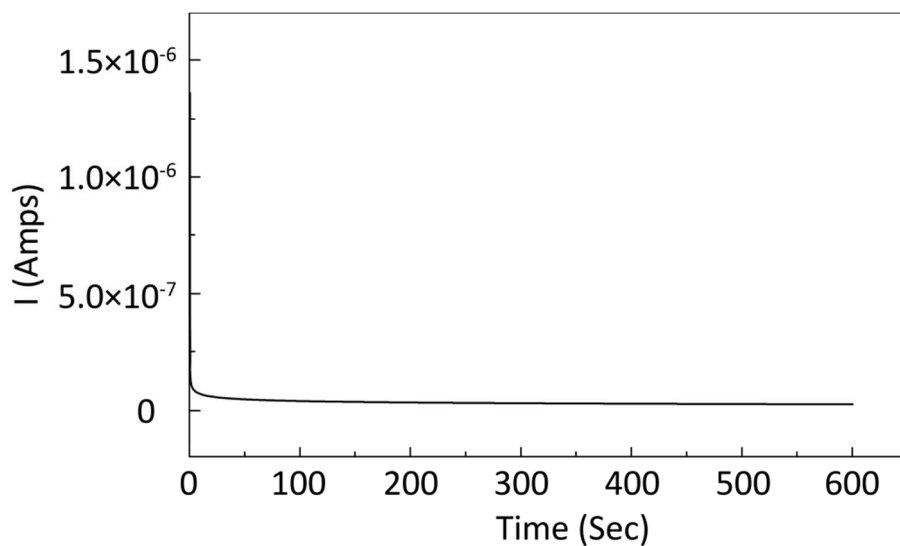

**Figure S1.** Direct current (DC) polarization curves for  $\text{Na}_{2.9}\text{PS}_{3.95}\text{Se}_{0.05}$  electrolyte.

The electronic conductivity ( $\sigma_e$ ,  $\text{S cm}^{-1}$ ) is determined by the following equation:  $\sigma_e = L/(R \times S)$ , where  $L$  ( $\sim 0.1$  cm) is the thickness of electrolyte,  $S$  ( $0.785 \text{ cm}^2$ ) is the area of the electrode,  $R$  ( $\Omega$ ) is related to the applied polarization voltage ( $0.1$  V) and the delivered constant current ( $I$ ). The constant current determined by DC polarization is  $3.08 \times 10^{-8} \text{ A}$ . The calculated electronic conductivity of  $\text{Na}_{2.9}\text{PS}_{3.95}\text{Se}_{0.05}$  electrolyte is  $3.9 \times 10^{-8} \text{ S cm}^{-1}$ . Hence,  $\text{Na}^+$  transference number is  $0.9997$  determined by  $t_{\text{Na}^+} = \sigma_i / \sigma = \sigma_i / (\sigma_e + \sigma_i)$ , where  $\sigma_e = 3.9 \times 10^{-8} \text{ S cm}^{-1}$ ,  $\sigma = 1.21 \times 10^{-4} \text{ S cm}^{-1}$ .

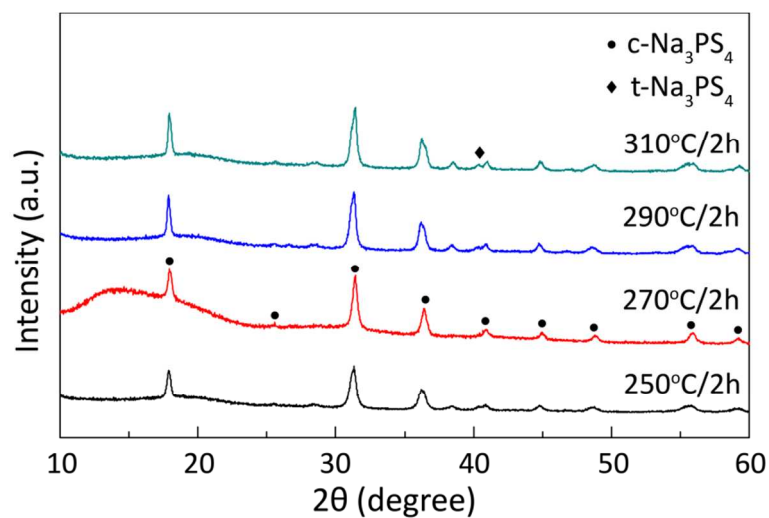

**Figure S2.** XRD patterns of  $\text{Na}_{2.9}\text{PS}_{3.95}\text{Se}_{0.05}$  samples under different annealing temperatures.

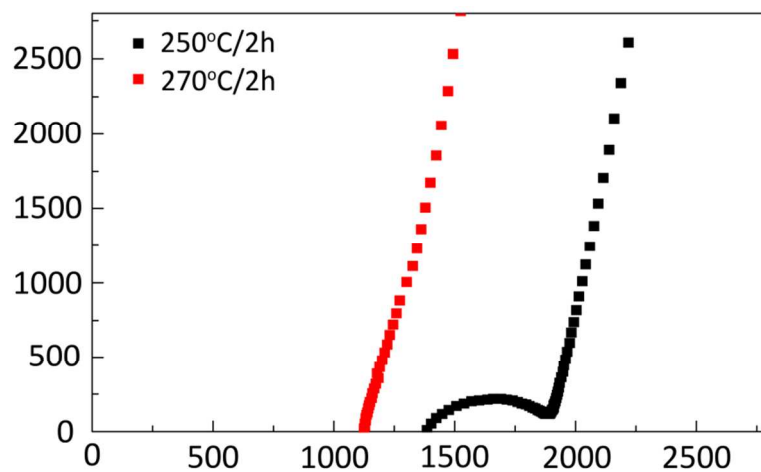

**Figure S3.** Impedance of Na<sub>2.9</sub>PS<sub>3.95</sub>Se<sub>0.05</sub> samples under different annealing temperatures.

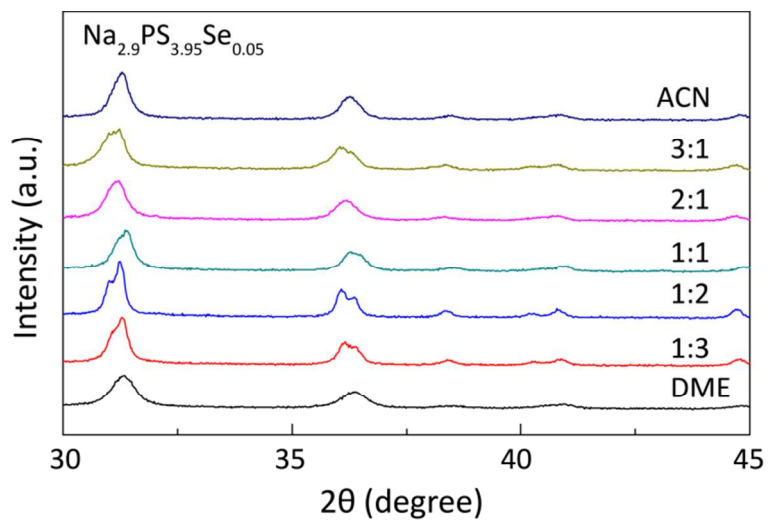

**Figure S4.** Powder X-ray diffraction patterns of  $\text{Na}_{2.9}\text{PS}_{3.95}\text{Se}_{0.05}$  samples using acetonitrile, 1, 2-dimethoxyethane and their mixed solvents (acetonitrile/1, 2-dimethoxyethane, volume ratio = 3:1, 2:1, 1:1, 1:2, 1:3).

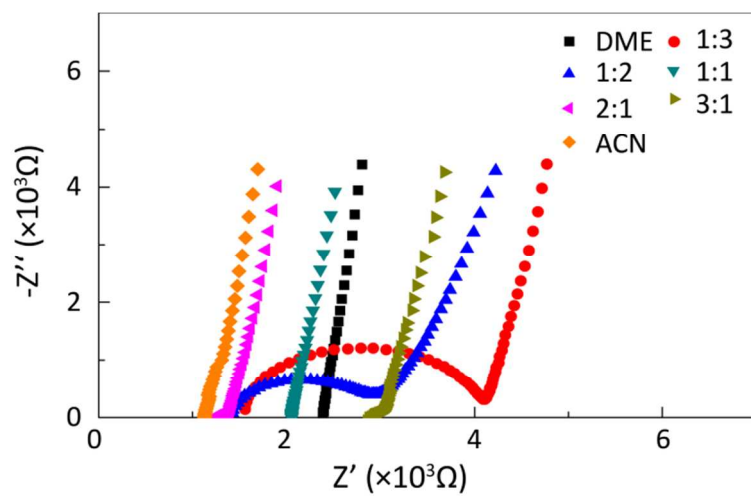

**Figure S5.** Impedance spectra of  $\text{Na}_{2.9}\text{PS}_{3.95}\text{Se}_{0.05}$  samples using acetonitrile, 1, 2-dimethoxyethane and their mixed solvents (acetonitrile/1, 2-dimethoxyethane, volume ratio = 3:1, 2:1, 1:1, 1:2, 1:3).

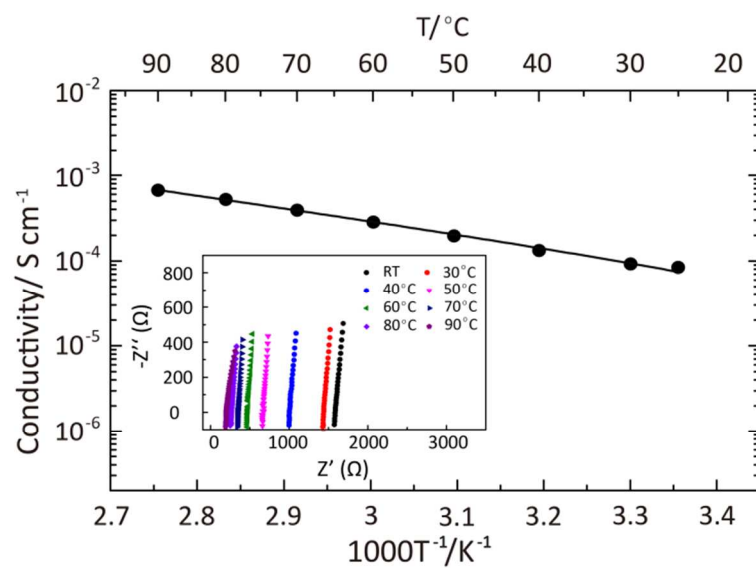

**Figure S6.** Temperature dependences of the ionic conductivities for  $\text{Na}_3\text{PS}_4$  (the inset is impedance spectra of the  $\text{Na}_3\text{PS}_4$  sample under different temperatures).

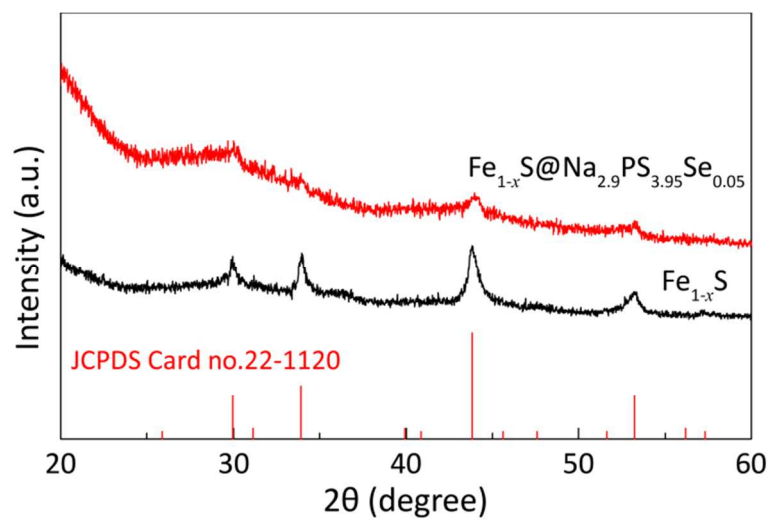

**Figure S7.** XRD patterns of  $\text{Fe}_{1-x}\text{S}$  and  $\text{Fe}_{1-x}\text{S}@_{\text{Na}_{2.9}\text{PS}_{3.95}\text{Se}_{0.05}}$ .



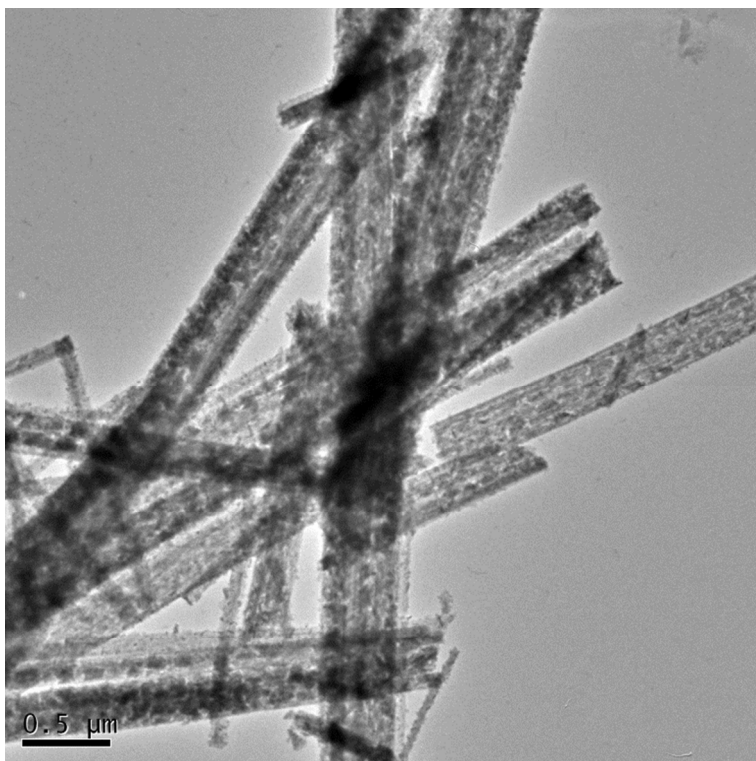

**Figure S8.** A TEM image of Fe<sub>1-x</sub>S nanorods.
